# Supplementary material for: Pain Reduction in Cervical Dystonia Following Treatment with IncobotulinumtoxinA: A Pooled Analysis
Source: MDPI journal article supplement (doi:10.3390/toxins15050333), 2023-05-12

## Supplementary Material

**Supplementary Table S1** Number of incobotulinumtoxinA-treated patients with pain severity assessed at the injection visit (IV) and control visit (CV) of each injection cycle for the total population and by individual study.

| Study visit | Total | Benecke et al. 2005<br>[19] | Comella et al. 2011<br>[20] | Dressler et al. 2013<br>[27] | Comella et al. 2022<br>[28] |
|-------------|-------|-----------------------------|-----------------------------|------------------------------|-----------------------------|
| IV1         | 678   | 191                         | 226                         | 72                           | 189                         |
| CV1         | 669   | 189                         | 222                         | 71                           | 187                         |
| IV2         | 465   | 0                           | 208                         | 68                           | 189                         |
| CV2         | 263   | 0                           | 197                         | 66                           | 0                           |
| IV3         | 435   | 0                           | 181                         | 65                           | 189                         |
| CV3         | 235   | 0                           | 172                         | 63                           | 0                           |
| IV4         | 411   | 0                           | 160                         | 63                           | 188                         |
| CV4         | 215   | 0                           | 153                         | 62                           | 0                           |
| IV5         | 371   | 0                           | 122                         | 61                           | 188                         |
| CV5         | 179   | 0                           | 112                         | 57                           | 10                          |
| IV6         | 248   | 0                           | 61                          | 0                            | 187                         |
| CV6         | 59    | 0                           | 59                          | 0                            | 0                           |
| IV7         | 188   | 0                           | 0                           | 0                            | 188                         |
| CV7         | 16    | 0                           | 0                           | 0                            | 16                          |
| IV8         | 189   | 0                           | 0                           | 0                            | 189                         |
| CV8         | 189   | 0                           | 0                           | 0                            | 189                         |
| IV9         | 10    | 0                           | 0                           | 0                            | 10                          |
| CV9         | 0     | 0                           | 0                           | 0                            | 0                           |
| IV10        | 5     | 0                           | 0                           | 0                            | 5                           |
| CV10        | 0     | 0                           | 0                           | 0                            | 0                           |
| IV11        | 4     | 0                           | 0                           | 0                            | 4                           |
| CV11        | 0     | 0                           | 0                           | 0                            | 0                           |

**Supplementary Table S2** Use of concomitant pain medication in the first injection cycle by patients who had pain at baseline and data available on pain medication use. IV, injection visit; CV, control visit.

|                                                 | <b>Total <i>n</i></b> | <b><i>n</i> (%) taking concomitant pain medication</b> |
|-------------------------------------------------|-----------------------|--------------------------------------------------------|
| IV1                                             | 678                   | 243 (35.8)                                             |
| Mild pain                                       | 247                   | 62 (25.1)                                              |
| Moderate pain                                   | 291                   | 118 (40.6)                                             |
| Severe pain                                     | 140                   | 63 (45.0)                                              |
| CV1                                             | 669                   | 250 (37.4)                                             |
| No pain                                         | 69                    | 15 (21.7)                                              |
| Mild pain                                       | 321                   | 97 (30.2)                                              |
| Moderate pain                                   | 223                   | 109 (48.9)                                             |
| Severe pain                                     | 56                    | 29 (51.8)                                              |
| Patients with $\geq 30\%$ pain reduction at CV1 | 322                   | 94 (29.2)                                              |
| Patients with $\geq 50\%$ pain reduction at CV1 | 230                   | 61 (26.5)                                              |

**Supplementary Figure S1** Number of incobotulinumtoxinA-treated patients with pain severity assessed during injection cycles 1–5 for the total population (numbers given outside each bar) and by study. IV, injection visit; CV, control visit.

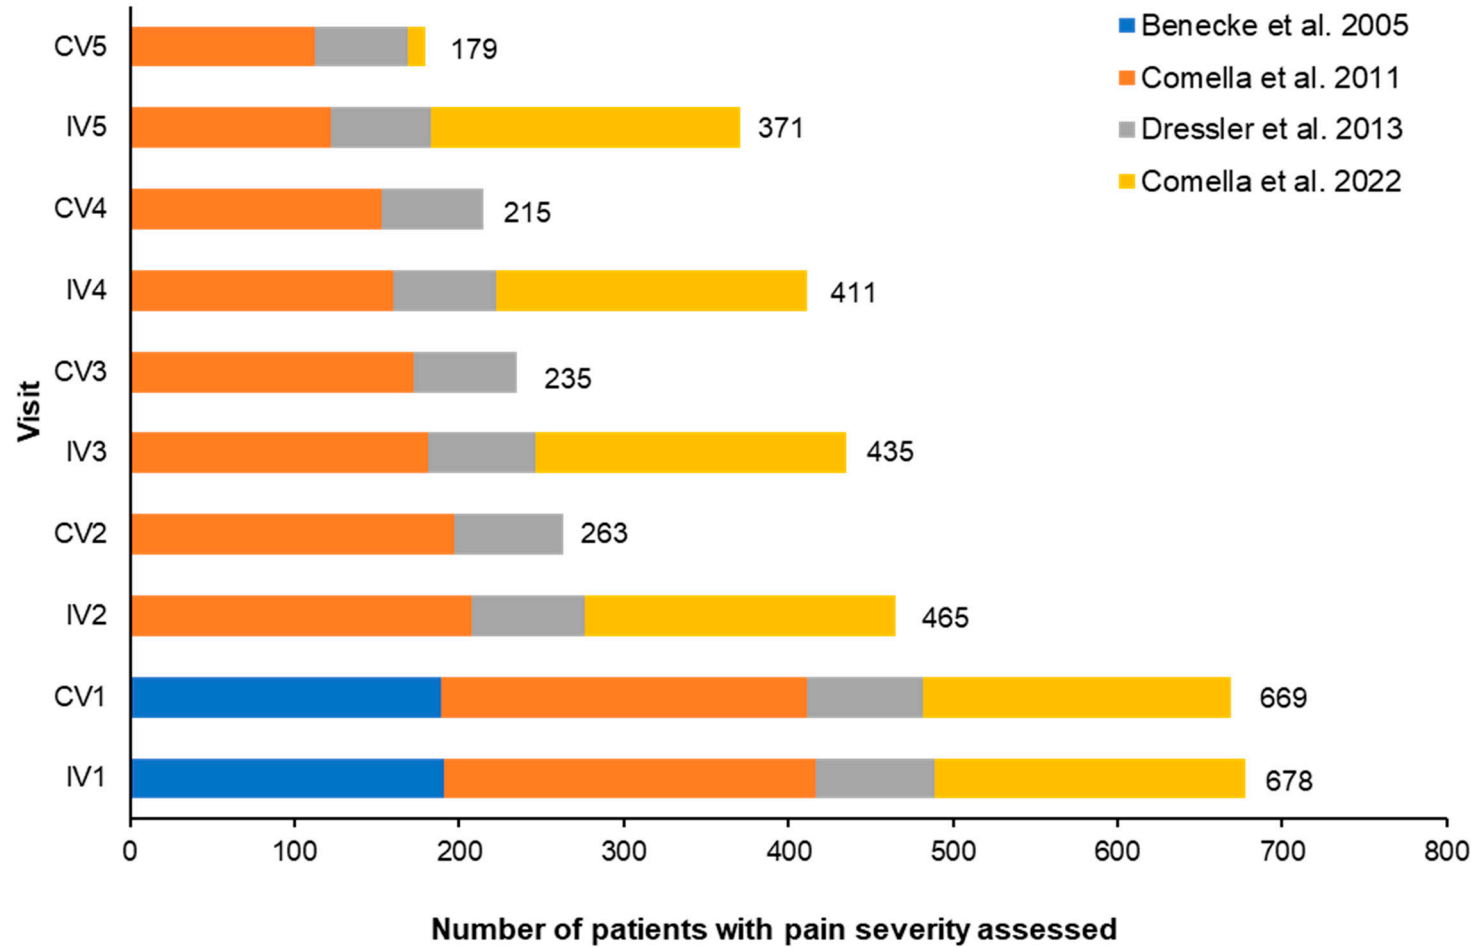

**Supplementary Figure S2** Percentage of patients in each pain severity category at baseline and control visit 1 (CV1) for (A) total population (N=669) and (B) subgroup of patients not taking concomitant pain medication (n=379)

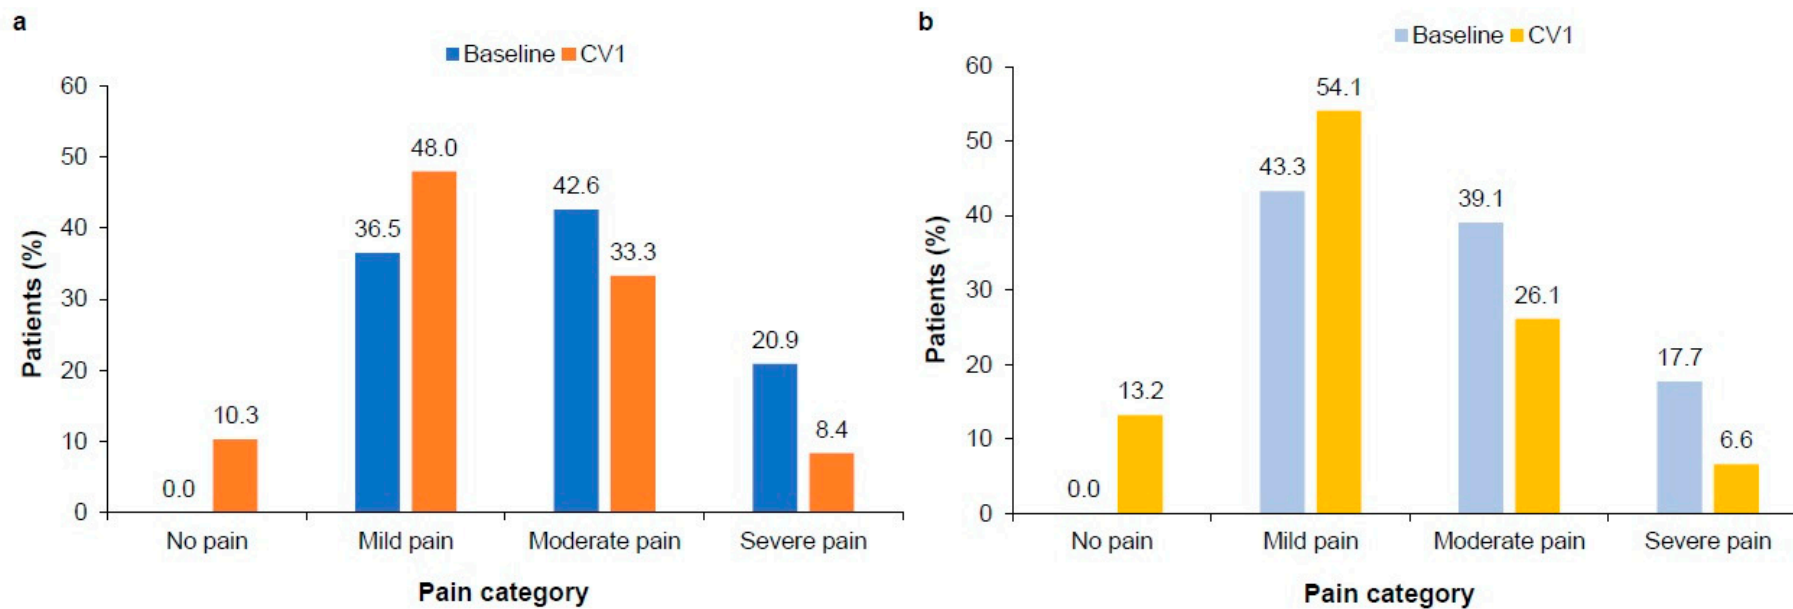

**Supplementary Figure S3** Category of pain severity at each visit following multiple injections of incobotulinumtoxinA. The percentages in each bar are based on the number of patients with a pain severity assessment at that visit (*n* value). CV, control visit, IV, injection visit.

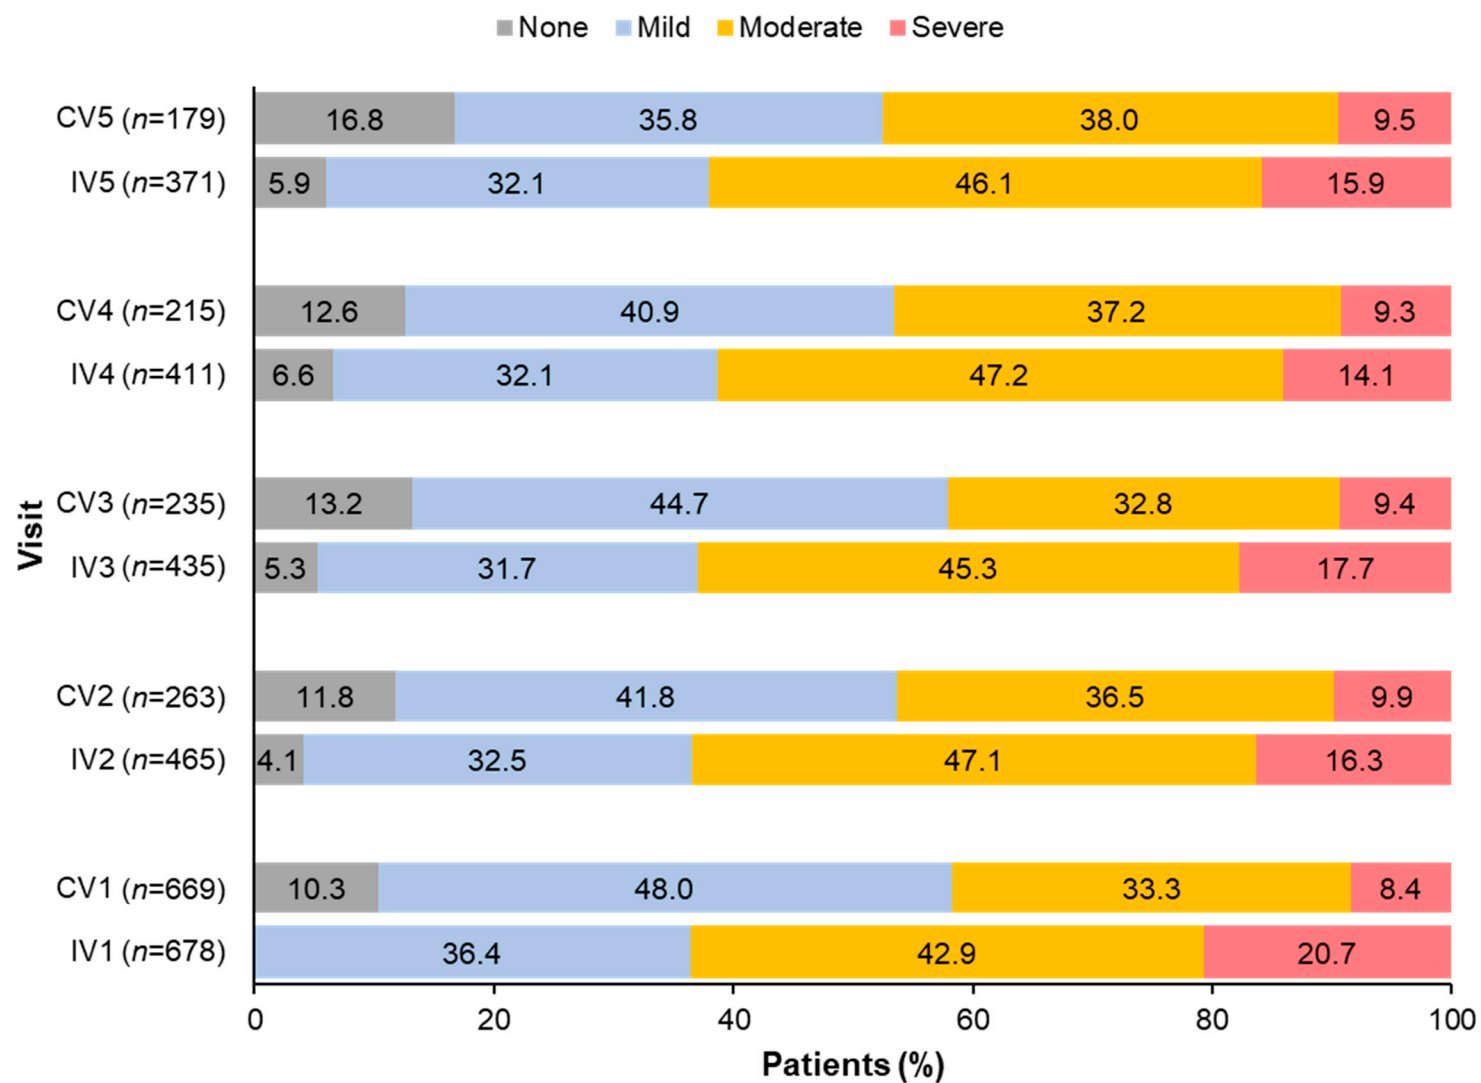

Supplement: s1 [file s1]
